# Supplementary material for: Gut microbiomes of four Australian stink bug species associated with citrus, and fitness effects of a dominant Pantoea-like symbiont in Biprorulus bibax
Source: Research Square preprint supplement (doi:10.21203/rs.3.rs-8890409/v1), 2026-02-24
Supplement: Supplementary file 1 [file 5132b2550fb272a07f60b507.docx]

**Table S1.** Metadata for stink bug M4 (crypt) samples used in this study (sample ID, species/family, sex, coordinates, date, host plant, collector

| **Sample** | **Species name** | **Family** | **Extracted tissue** | **Sex** | **Coordinates** | **Date** | **Host plant** | **Col.** |
| --- | --- | --- | --- | --- | --- | --- | --- | --- |
| **SCB1** | *Biprorulus bibax* | Pentatomidae | M4 region (crypts) | Female | 33°36'S 150°44'E | Jun-21 | Mandarin | A. Katlav |
| **SCB2** | *Biprorulus bibax* | Pentatomidae | M4 region (crypts) | Female | 33°36'S 150°44'E | Jun-21 | Mandarin | A. Katlav |
| **SCB3** | *Biprorulus bibax* | Pentatomidae | M4 region (crypts) | Female | 33°36'S 150°44'E | Jun-21 | Mandarin | A. Katlav |
| **SCB4** | *Biprorulus bibax* | Pentatomidae | M4 region (crypts) | Female | 33°36'S 150°44'E | Jun-21 | Lemon | A. Katlav |
| **SCB5** | *Biprorulus bibax* | Pentatomidae | M4 region (crypts) | Male | 33°36'S 150°44'E | Jun-21 | Lemon | A. Katlav |
| **SCB6** | *Biprorulus bibax* | Pentatomidae | M4 region (crypts) | Female | 33°36'S 150°44'E | Jun-21 | Mandarin | A. Katlav |
| **SCB7** | *Biprorulus bibax* | Pentatomidae | M4 region (crypts) | Male | 33°36'S 150°44'E | Jun-21 | Mandarin | A. Katlav |
| **SCB8** | *Biprorulus bibax* | Pentatomidae | M4 region (crypts) | Female | 33°36'S 150°44'E | Jun-21 | Mandarin | A. Katlav |
| **SCB9** | *Biprorulus bibax* | Pentatomidae | M4 region (crypts) | Male | 33°36'S 150°44'E | Jun-21 | Orange | A. Katlav |
| **SCB10** | *Biprorulus bibax* | Pentatomidae | M4 region (crypts) | Male | 33°36'S 150°44'E | Jun-21 | Orange | A. Katlav |
| **GTB1** | *Poecilometis strigatus* | Pentatomidae | M4 region (crypts) | Female | 33°36'S 150°44'E | Jun-21 | Mandarin | A. Katlav |
| **GTB2** | *Poecilometis strigatus* | Pentatomidae | M4 region (crypts) | Male | 33°36'S 150°44'E | Jun-21 | Mandarin | A. Katlav |
| **GTB3** | *Poecilometis strigatus* | Pentatomidae | M4 region (crypts) | Female | 33°36'S 150°44'E | Jun-21 | Mandarin | A. Katlav |
| **GTB4** | *Poecilometis strigatus* | Pentatomidae | M4 region (crypts) | Female | 33°36'S 150°44'E | Jun-21 | Mandarin | A. Katlav |
| **GTB5** | *Poecilometis strigatus* | Pentatomidae | M4 region (crypts) | Female | 33°36'S 150°44'E | Jun-21 | Mandarin | A. Katlav |
| **LB1** | *Lyramorpha rosea* | Tessaratomidae | M4 region (crypts) | Female | 33°36'S 150°44'E | Jun-21 | Mandarin | A. Katlav |
| **LB2** | *Lyramorpha rosea* | Tessaratomidae | M4 region (crypts) | Male | 33°36'S 150°44'E | Jun-21 | Mandarin | A. Katlav |
| **LB3** | *Lyramorpha rosea* | Tessaratomidae | M4 region (crypts) | Male | 33°36'S 150°44'E | Jun-21 | Mandarin | A. Katlav |
| **LB4** | *Lyramorpha rosea* | Tessaratomidae | M4 region (crypts) | Female | 33°36'S 150°44'E | Jun-21 | Grapefruit | A. Katlav |
| **LB5** | *Lyramorpha rosea* | Tessaratomidae | M4 region (crypts) | Female | 33°36'S 150°44'E | Jun-21 | Mandarin | A. Katlav |
| **LB6** | *Lyramorpha rosea* | Tessaratomidae | M4 region (crypts) | Female | 33°36'S 150°44'E | Jun-21 | Grapefruit | A. Katlav |
| **LB7** | *Lyramorpha rosea* | Tessaratomidae | M4 region (crypts) | Female | 33°36'S 150°44'E | Jun-21 | Grapefruit | A. Katlav |
| **LB8** | *Lyramorpha rosea* | Tessaratomidae | M4 region (crypts) | Female | 33°36'S 150°44'E | Jun-21 | Mandarin | A. Katlav |
| **LB9** | *Lyramorpha rosea* | Tessaratomidae | M4 region (crypts) | Female | 33°36'S 150°44'E | Jun-21 | Mandarin | A. Katlav |
| **BOB1** | *Musgraveia sulciventris* | Tessaratomidae | M4 region (crypts) | Female | 33°36'S 150°44'E | Jun-21 | Lemon | A. Katlav |
| **BOB2** | *Musgraveia sulciventris* | Tessaratomidae | M4 region (crypts) | Female | 33°36'S 150°44'E | Jun-21 | Orange | A. Katlav |
| **BOB3** | *Musgraveia sulciventris* | Tessaratomidae | M4 region (crypts) | Female | 33°36'S 150°44'E | Jun-21 | Orange | A. Katlav |
| **BOB4** | *Musgraveia sulciventris* | Tessaratomidae | M4 region (crypts) | Female | 33°36'S 150°44'E | Jun-21 | Orange | A. Katlav |
| **BOB5** | *Musgraveia sulciventris* | Tessaratomidae | M4 region (crypts) | Female | 33°36'S 150°44'E | Jun-21 | Orange | A. Katlav |
| **BOB6** | *Musgraveia sulciventris* | Tessaratomidae | M4 region (crypts) | Male | 33°36'S 150°44'E | Jun-21 | Orange | A. Katlav |
| **BOB7** | *Musgraveia sulciventris* | Tessaratomidae | M4 region (crypts) | Male | 33°36'S 150°44'E | Jun-21 | Lemon | A. Katlav |
| **BOB8** | *Musgraveia sulciventris* | Tessaratomidae | M4 region (crypts) | Female | 33°36'S 150°44'E | Jun-21 | Lemon | A. Katlav |
