# Supplementary material for: Gut microbiomes of four Australian stink bug species associated with citrus, and fitness effects of a dominant Pantoea-like symbiont in Biprorulus bibax
Source: Research Square preprint supplement (doi:10.21203/rs.3.rs-8890409/v1), 2026-02-24
Supplement: Supplementary file 2 [file f7313a1426704a81e95ba41e.docx]

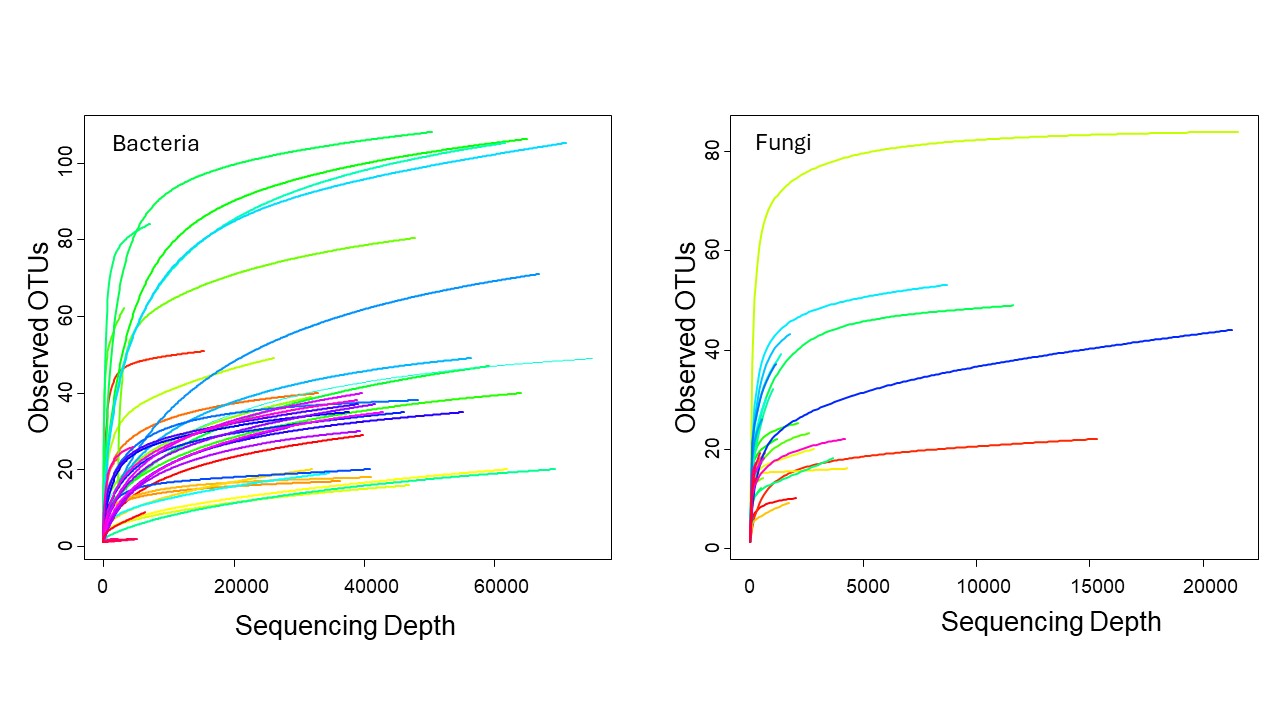


**Figure S1.** Rarefaction curves of bacterial and fungal communities. Rarefaction plots show the accumulation of observed OTUs with increasing sequencing depth for bacteria (16S rRNA gene; left) and fungi (ITS; right). Each coloured curve represents an individual sample. Curves approaching a plateau indicate that additional sequencing would yield relatively few new OTUs, whereas non-plateauing curves suggest incomplete sampling of richness in some samples.
